# Supplementary material for: Conformal electrodeposition of ultrathin polymeric films with tunable properties from dual-functional monomers
Source: Royal Society of Chemistry journal article supplement (doi:10.1039/d2me00246a), 2023-01-01
Supplement: d2me00246a1.pdf [file d2me00246a1.pdf]

## Supporting Information

for

# Conformal Electrodeposition of Ultrathin Polymeric Films with Tunable Properties from Dual-Functional Monomers

*Wenlu Wang<sup>1</sup>, Zhaoyi Zheng<sup>1</sup>, Anton B. Resing<sup>1</sup>, Keith A. Brown<sup>1,2,3</sup>, Jörg G. Werner<sup>1,2\*</sup>*

<sup>1</sup> Division of Materials Science and Engineering, Boston University, Boston, MA 02215, USA

<sup>2</sup> Department of Mechanical Engineering, Boston University, Boston, MA 02215, USA

<sup>3</sup> Department of Physics, Boston University, Boston, MA 02215, USA

\*Corresponding author: [jgwerner@bu.edu](mailto:jgwerner@bu.edu)

KEYWORDS: electrodeposition, conformal coatings, self-limiting deposition, functional polymer, ultrathin film, 3D architecture

## 1. Materials

The platinum wire (diam. 0.25 mm, 99.9% trace metals basis) for the counter electrode and the chemicals 2,2-(ethylenedioxy)diethanethiol (95%), 2-allylphenol (98%), decamethylferrocene (“DMFc”, 97%), lithium perchlorate (99.99%), indium-gallium eutectic (“eGaIn”, gallium 75.5%, indium 24.5%,  $\geq 99.99\%$  trace metals basis), dimethyl sulfoxide (“DMSO”, anhydrous), poly(acrylonitrile) (“PAN”, 150 kg/mol), and tetramethylammonium hydroxide pentahydrate (“TMAH”,  $\geq 97\%$ ) were purchased from Sigma Aldrich. Tetrabutylammonium perchlorate (“TBAP”,  $\geq 97.5\%$ ), silver perchlorate (anhydrous), Indium-Tin-Oxide (ITO) coated glass ( $R_s = 70\text{-}100\ \Omega$ ), and acetonitrile (anhydrous) were purchased from Fisher Scientific. Lithium titanate (“LTO”,  $\text{Li}_4\text{Ti}_5\text{O}_{12}$ ) was purchased from MTI Corporation. Triton X-100 was purchased from J.T. Baker. The silver wire for the reference electrode was supplied by Gamry Instruments. All chemicals were used without further purification.

## 2. Triethyleneglycol Diphenol Synthesis and Purification

The monomer denoted as triethyleneglycol diphenol (TEG-DP) for electrodeposition was obtained from the UV-initiated thiol-ene reaction between 2-allylphenol and 2,2-(ethylenedioxy) diethanethiol (TEG-DT), which were mixed at a molar ratio of 2.2:1 without solvent. In a typical synthesis, 8 mL of the liquid mixture typically was stirred in a borosilicate glass vial and exposed to 302 nm UV (8 W, 3-4 cm distance) for 48 hours. The product was then purified by column chromatography using 60  $\mu\text{m}$  silica gel as the stationary phase and an acetone/hexane solvent system with increasing polarity (from 20% acetone to 60% acetone in hexane) was used as the mobile phase. The conversion of allyl groups was confirmed by proton nuclear magnetic resonance ( $^1\text{H-NMR}$ ) spectroscopy in deuterated chloroform on an Agilent 400 MHz VNMRS.

### **3. Porous Carbon Electrode and LTO-Carbon Composite Electrode Fabrication**

Carbon electrodes were prepared using non-solvent induced phase inversion of a PAN solution (84 wt% in DMSO, 10.5 wt% PAN, 5.5 wt% water) cast at 200-400  $\mu\text{m}$  in thickness on a DMSO-gel and immersed in DI-water, followed by cross-linking at 250  $^{\circ}\text{C}$  in air and subsequent carbonization at 750  $^{\circ}\text{C}$  for 1 hour. A wire was attached to the dense (top) side of the electrodes with silver epoxy and sealed by poly(dimethyl siloxane) (Dow Sylgard 184).

LTO-carbon composite electrodes were fabricated with the same method but using an LTO-PAN suspension. LTO dispersion was prepared by mixing LTO with a solution of Triton X-100 and DMSO. Then the dispersion and above PAN solution were mixed to form a suspension with a 2:1 mass ratio of LTO to PAN.

The resulting carbon and LTO-carbon electrodes have low-tortuosity cylindrical pores of 2-20  $\mu\text{m}$  in diameter, thickness of 25~80  $\mu\text{m}$  and a footprint area of 0.385  $\text{cm}^2$ .

### **4. Film Electrodeposition**

The electrodeposition of TEG-DP was performed in acetonitrile at various concentrations (50 mM, 10 mM, 1 mM). The solutions contained TMAH at stoichiometric ratios to the phenol unit to form the oxidizable phenolate, as well as the supporting electrolyte TBAP at a concentration of 0.1 M. For electrodeposition, ITO-coated glass slides and a cylindrical glass cell were clamped together with an O-ring (DuPont Kalrez®), confining the deposition area to a circle of 15 mm in diameter. The deposition on porous carbon electrodes was carried out in a 4 mL glass vial. The deposition cells for both porous carbon and ITO were filled with 1 mL of monomer solution and a platinum wire counter electrode and Ag/Ag<sup>+</sup> reference electrode (silver wire in 0.05 M silver perchlorate and 0.1 M TBAP solution in acetonitrile separated by a Gamry glass frit from the monomer solution) were submerged in the solution.

All electrochemical experiments were performed on a Gamry Reference 600+ potentiostat. Cyclic voltammetry (CV) on porous carbon was performed on the 50 mM TEG diphenol monomer solution between -1 V and +1 V vs. Ag/Ag<sup>+</sup> at 50mV/s for 6 separate cycles. Chronoamperometry (CA) on ITO was conducted on all monomer solutions at 7 different potentials (-0.5 V, -0.3 V, -0.1 V, +0.1 V, +0.3 V, +0.5 V, +0.7 V vs. Ag/Ag<sup>+</sup>) for a duration of 20 minutes. Before and after each deposition, CVs of 0.001 M decamethylferrocene in 0.1 M TBAP solution in acetonitrile were utilized to evaluate the surface passivation, sweeping between -0.85 and -0.05 V vs. Ag/Ag<sup>+</sup> for 3 cycles at 50 mV/s. The resulting poly(TEG-diphenol) (or simply pTEG-DP) coated substrates were cleaned with acetonitrile, and dried at room temperature in an ambient atmosphere.

Exploration of the water effect on the film property was conducted in solutions with a composition of 25 mM TEG-DP, 50 mM triethylamine (TEA, anhydrous), 0.1 M TBAP and 5 water concentrations (0 M, 0.125 M, 0.25 M, 0.375 M, and 0.5 M). Films were deposited on ITO at 0.2 V vs. Ag/Ag<sup>+</sup> for 20 min. Post-deposition CA for the anhydrous (0 M water) group was then carried out in 0.025 M triethylamine and 0.1 M TBAP solution applying 0.2 V vs. Ag/Ag<sup>+</sup> for 5 minutes.

The electrochemical quartz crystal microbalance (E-QCM) measurement was performed on the QSense Electrochemistry module on a Biolin Scientific E4 QCM-D where an ITO coated quartz crystal with a resonance frequency of 5 MHz, a silver wire, and a platinum foil were assembled as working electrode, quasi reference electrode (QRE), and counter electrode, respectively. Change of mass of 50 mM TEG-DP monomer solution during the CV sweeping from 0 to 1.4 V vs. Ag QRE was recorded using Q Sense E4 Quartz Crystal Microbalance.

## **5. Film Characterization**

Film thickness and roughness measurements were carried out on an Asylum Research MFP-3D Infinity Atomic Force Microscope (AFM) using alternating contact mode with a  $20 \times 20 \mu\text{m}^2$  and  $500 \times 500 \text{ nm}^2$  field of view, respectively. Scanning electron microscopy (SEM) of the films was performed on a Zeiss Supra 55 SEM with an electron beam accelerating voltage of 3 kV using an in-lens or secondary electron detector. Two-electrode electrochemical impedance spectroscopy (EIS) measurements were performed on a Gamry Reference 600+ potentiostat using a gallium-indium eutectic drop sandwiched between the pTEG-DP coated (working electrode) and a bare ITO-coated glass slide (counter and reference electrode) separated by a 1 mm silicone rubber spacer resulting in a contact area of  $0.785\text{-}3.14 \text{ mm}^2$ . EIS measurements were taken around the open circuit potential with a signal amplitude of 10 mV over the frequency range of [0.05 Hz, 5 MHz]. The same ‘sandwich’ setup was used in dielectric breakdown measurements but a linearly increasing potential was applied at a scan rate of 50 mV/s until the current increased dramatically and deviates from the ohmic behavior.

## **6. Battery test**

Pulse potentiostatic deposition was employed on porous carbon lithium titanate (LTO) composite electrodes where a 5-second potentiostatic voltage at +0.1 V (vs. Ag/Ag<sup>+</sup>) was applied followed by a 10-second rest for monomer replenishing and equilibrating in the 3D structure and the process was repeated for 240 cycles to reach a total deposition time of 20 minutes. Then the coated electrode was wetted with an excess of 1 M lithium hexafluorophosphate (LiPF<sub>6</sub>) in EC:DMC 50/50 v/v electrolyte and assembled with a polypropylene separator and a lithium metal anode. The obtained coin cell was charged and discharged at 9.1 mA/g (0.05 C, C-rate is calculated based on the theoretical LTO capacity, 175 mAh/g) on an MTI Battery Analyzer.

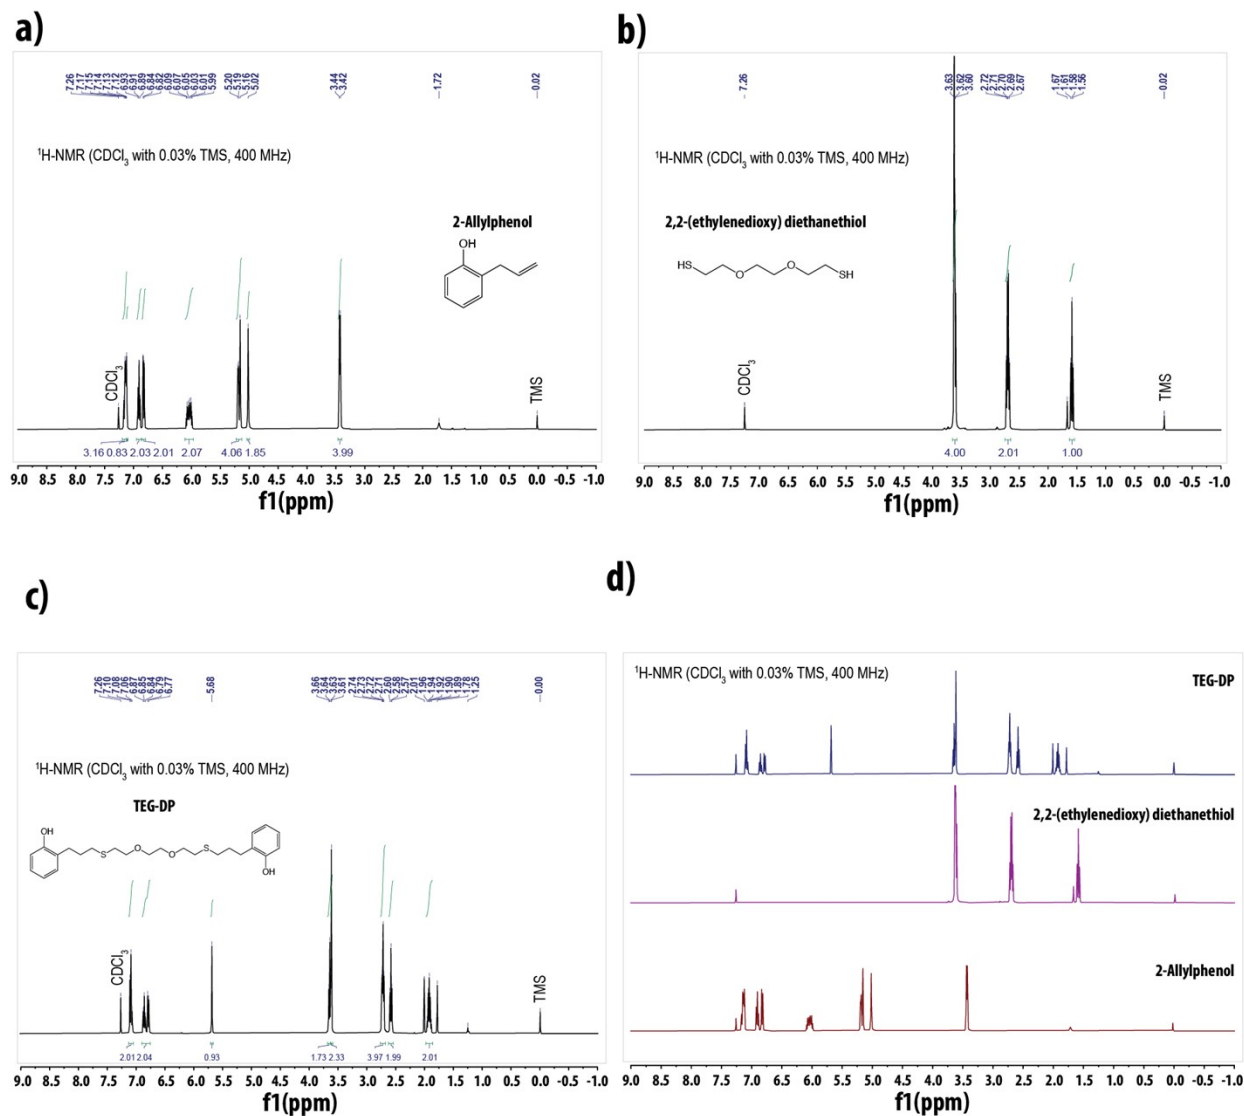

**Figure S1.** <sup>1</sup>H-NMR spectra and chemical structure of (a) 2-allylphenol, (b) 2,2-(ethylenedioxy) diethanethiol, and (c) TEG-DP. (d) Overlaid <sup>1</sup>H-NMR spectra of TEG-DP, 2-Allylphenol and 2,2-(ethylenedioxy) diethanethiol.

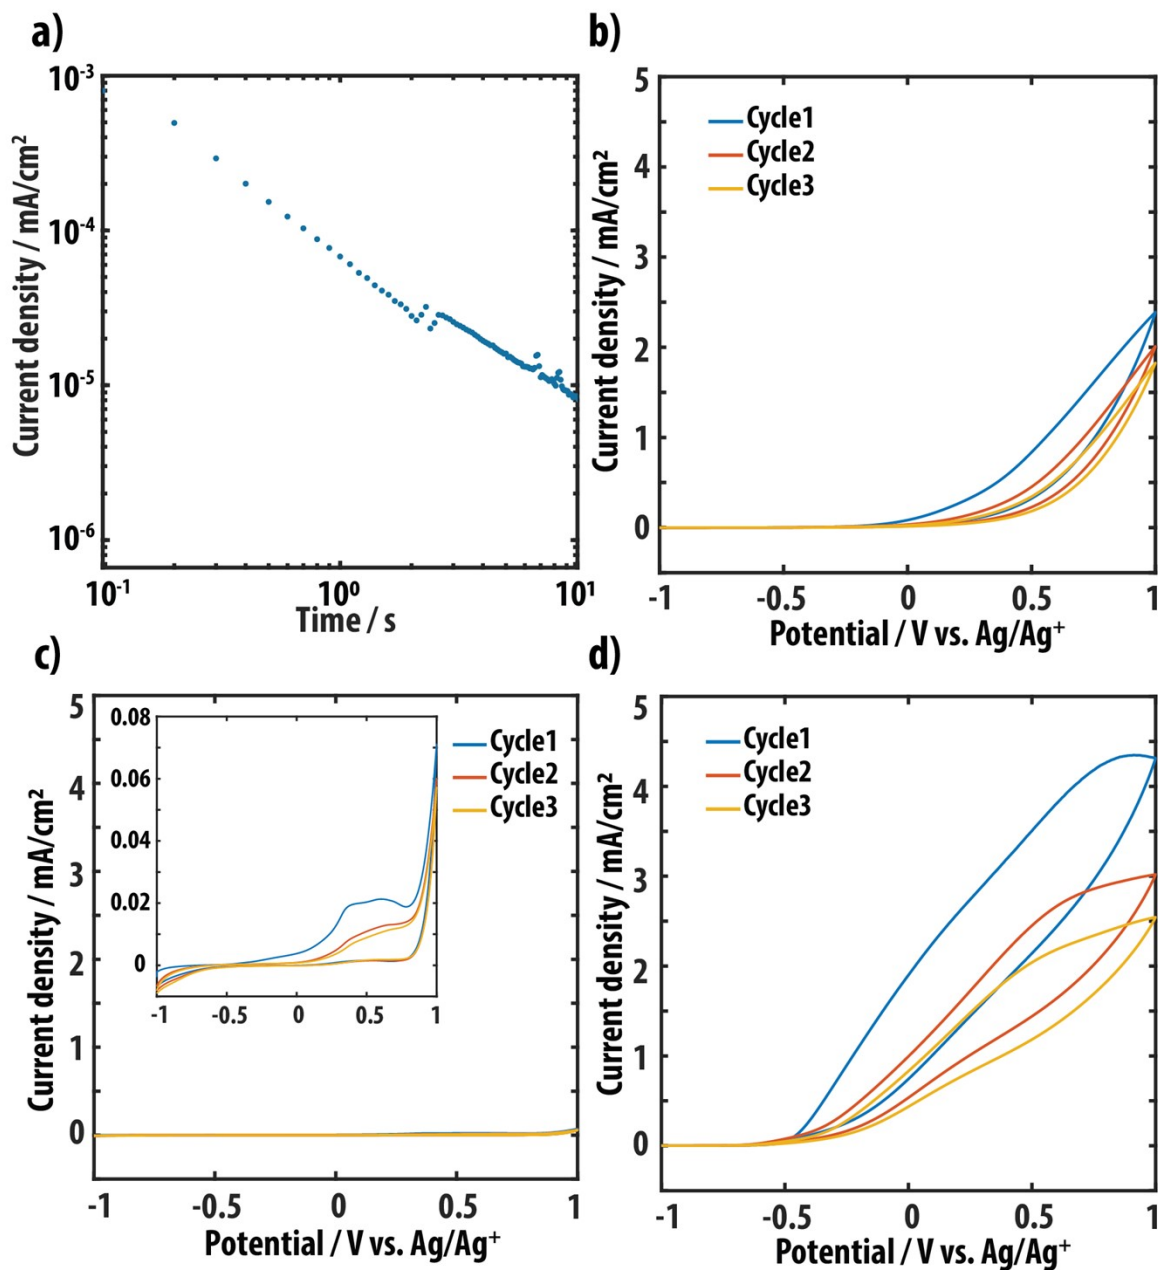

**Figure S2.** (a) Chronoamperometry of 100 mM TBAP solution at +0.7 V vs. Ag/Ag<sup>+</sup>. Cyclic voltammetry of acetonitrile-based solutions containing (b) 100 mM TMAH·5H<sub>2</sub>O and 100 mM TBAP, (c) 50 mM 2,2-(ethylenedioxy) diethanethiol and 100 mM TBAP, and (d) 50 mM 2,2-(ethylenedioxy) diethanethiol, 100 mM TMAH·5H<sub>2</sub>O and 100 mM TBAP.

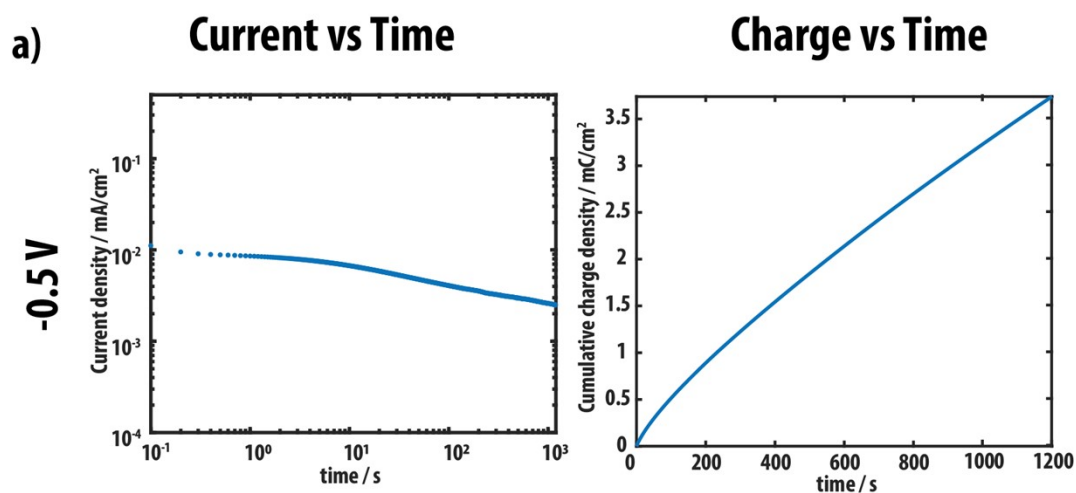

**Figure S3a.** Chronoamperometry and cumulative charge of 50 mM TEG-DP monomer solution electrodeposited at  $E_{\text{dep}} = -0.5 \text{ V}$  vs.  $\text{Ag}/\text{Ag}^+$  which is categorized as regime 1.

*continued on next page...*



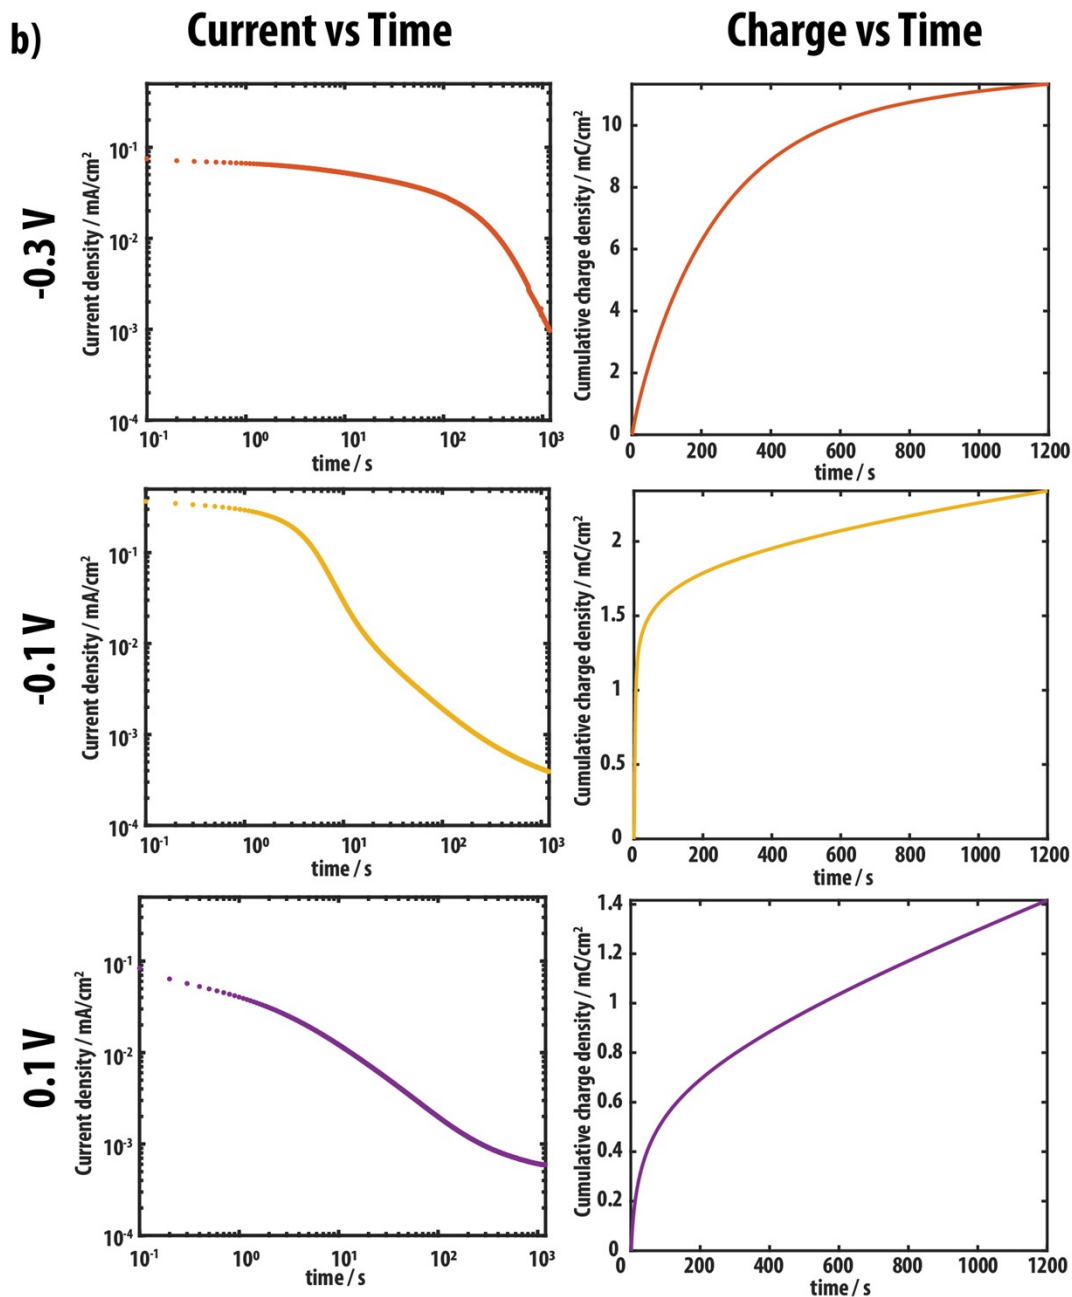

**Figure S3b.** Chronoamperometry and cumulative charge of 50 mM TEG-DP monomer solution electrodeposited at  $E_{\text{dep}} = -0.3$  V,  $-0.1$  V and  $+0.1$  V vs.  $\text{Ag}/\text{Ag}^+$  which are categorized as regime 2.

*continued on next page...*

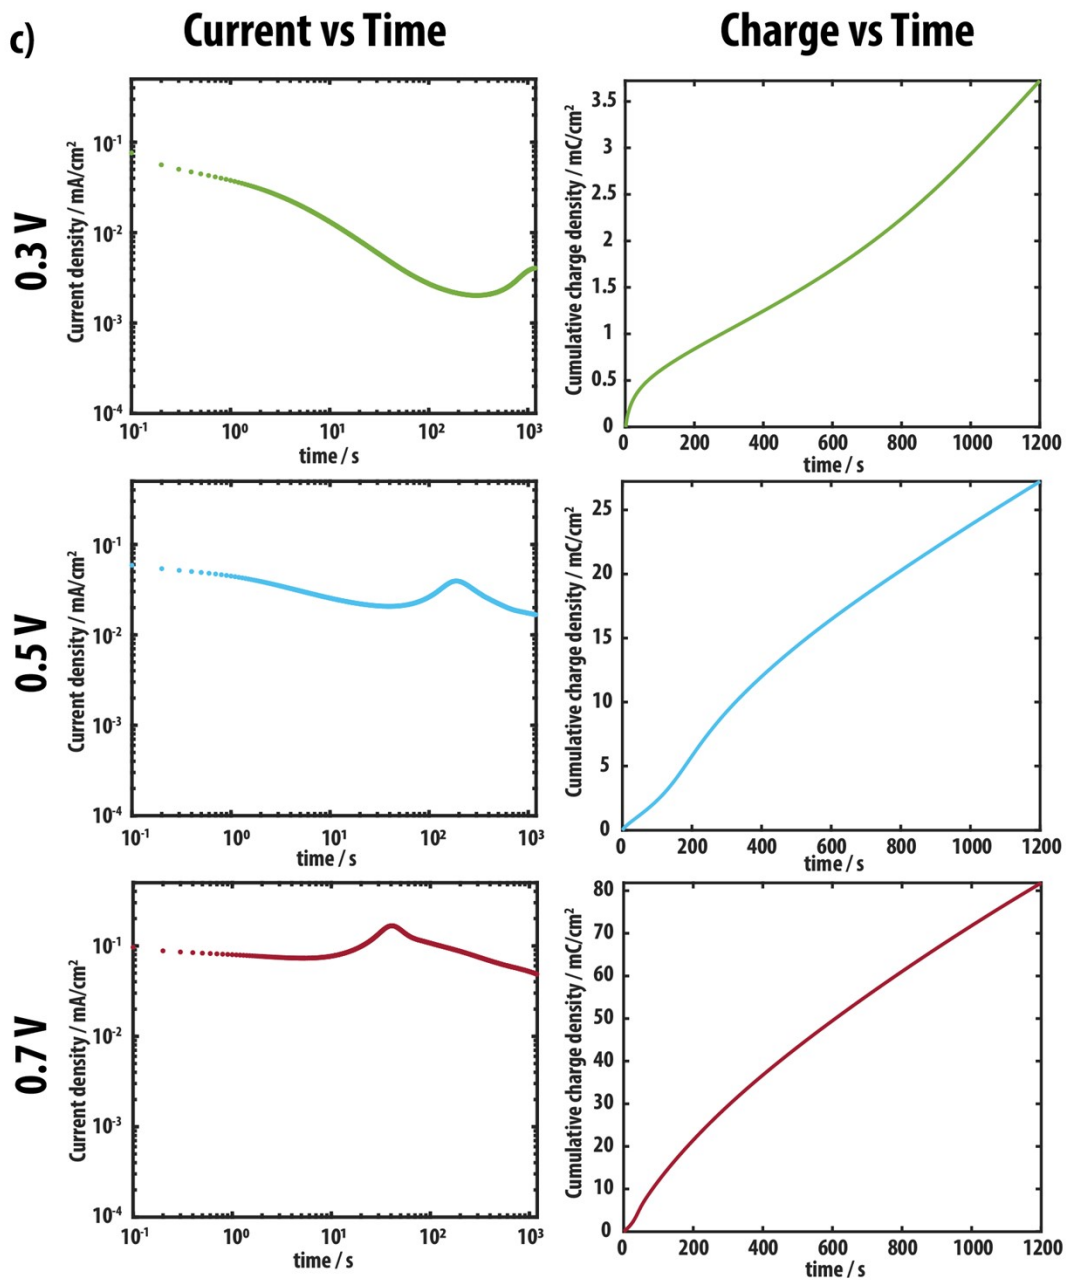

**Figure S3c.** Chronoamperometry and cumulative charge of 50 mM TEG-DP monomer solution electrodeposited at  $E_{\text{dep}} = +0.3$  V,  $+0.5$  V and  $+0.7$  V vs. Ag/Ag<sup>+</sup> which are categorized as regime 3.

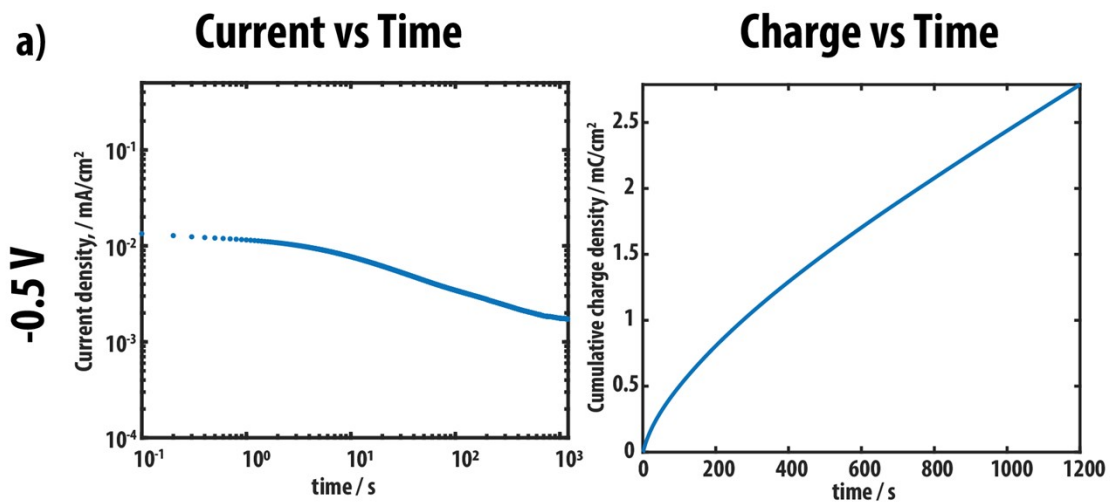

**Figure S4a.** Chronoamperometry and cumulative charge of 10 mM TEG-DP monomer solution electrodeposited at  $E_{\text{dep}} = -0.5 \text{ V}$  vs.  $\text{Ag}/\text{Ag}^+$  which is categorized as regime 1.

*continued on next page...*

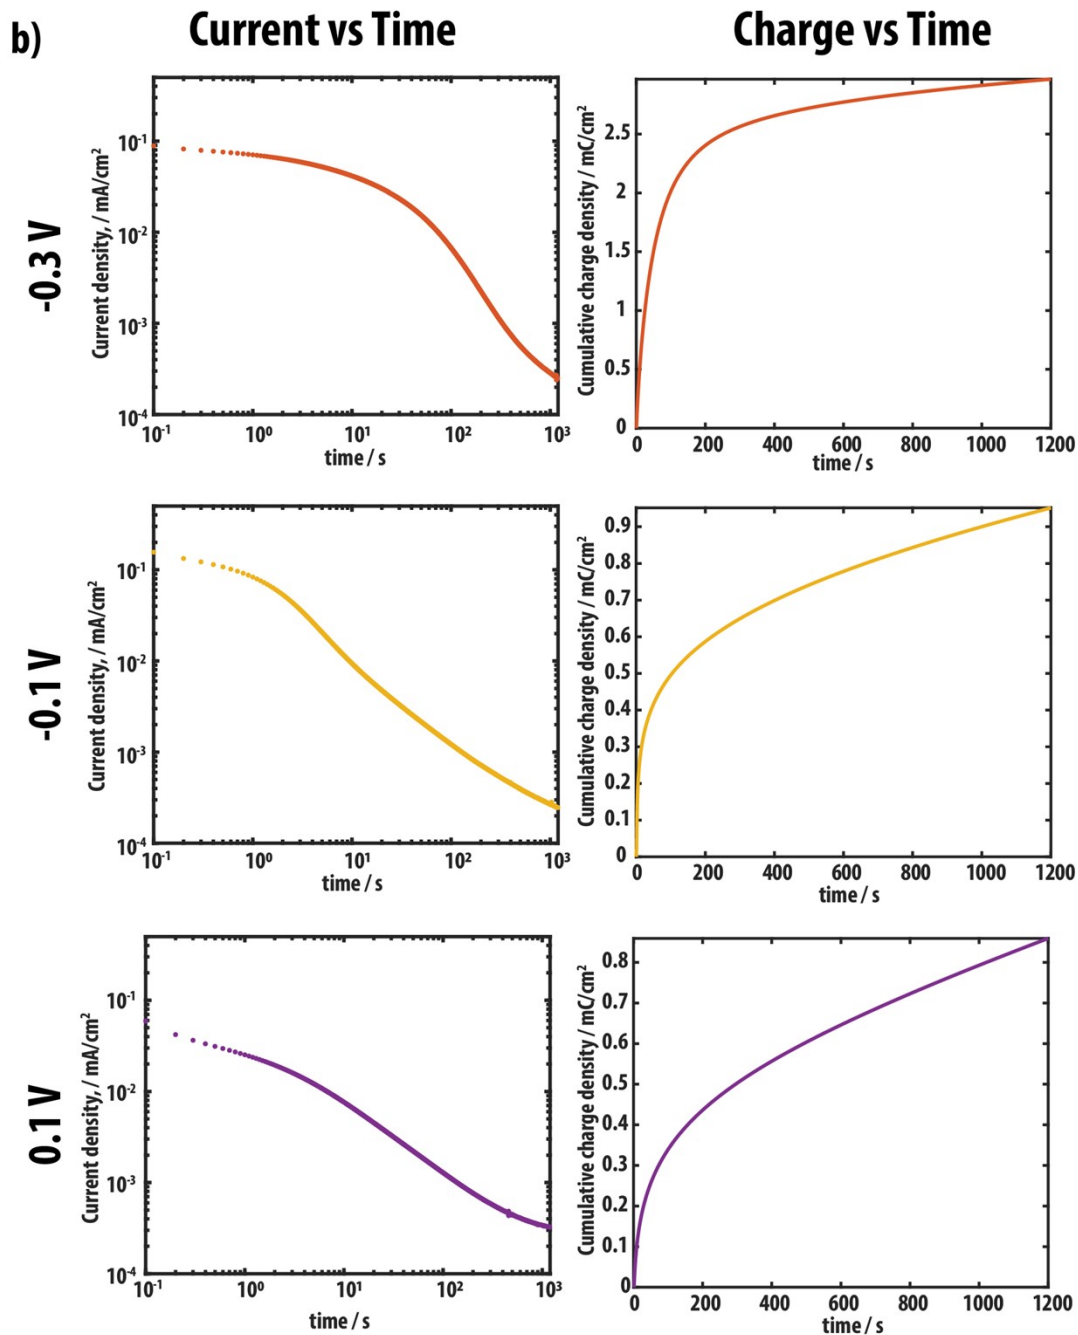

**Figure S4b.** Chronoamperometry and cumulative charge of 10 mM TEG-DP monomer solution electrodeposited at  $E_{\text{dep}} = -0.3$  V,  $-0.1$  V and  $+0.1$  V vs.  $\text{Ag}/\text{Ag}^+$  which are categorized as regime 2.

*continued on next page...*

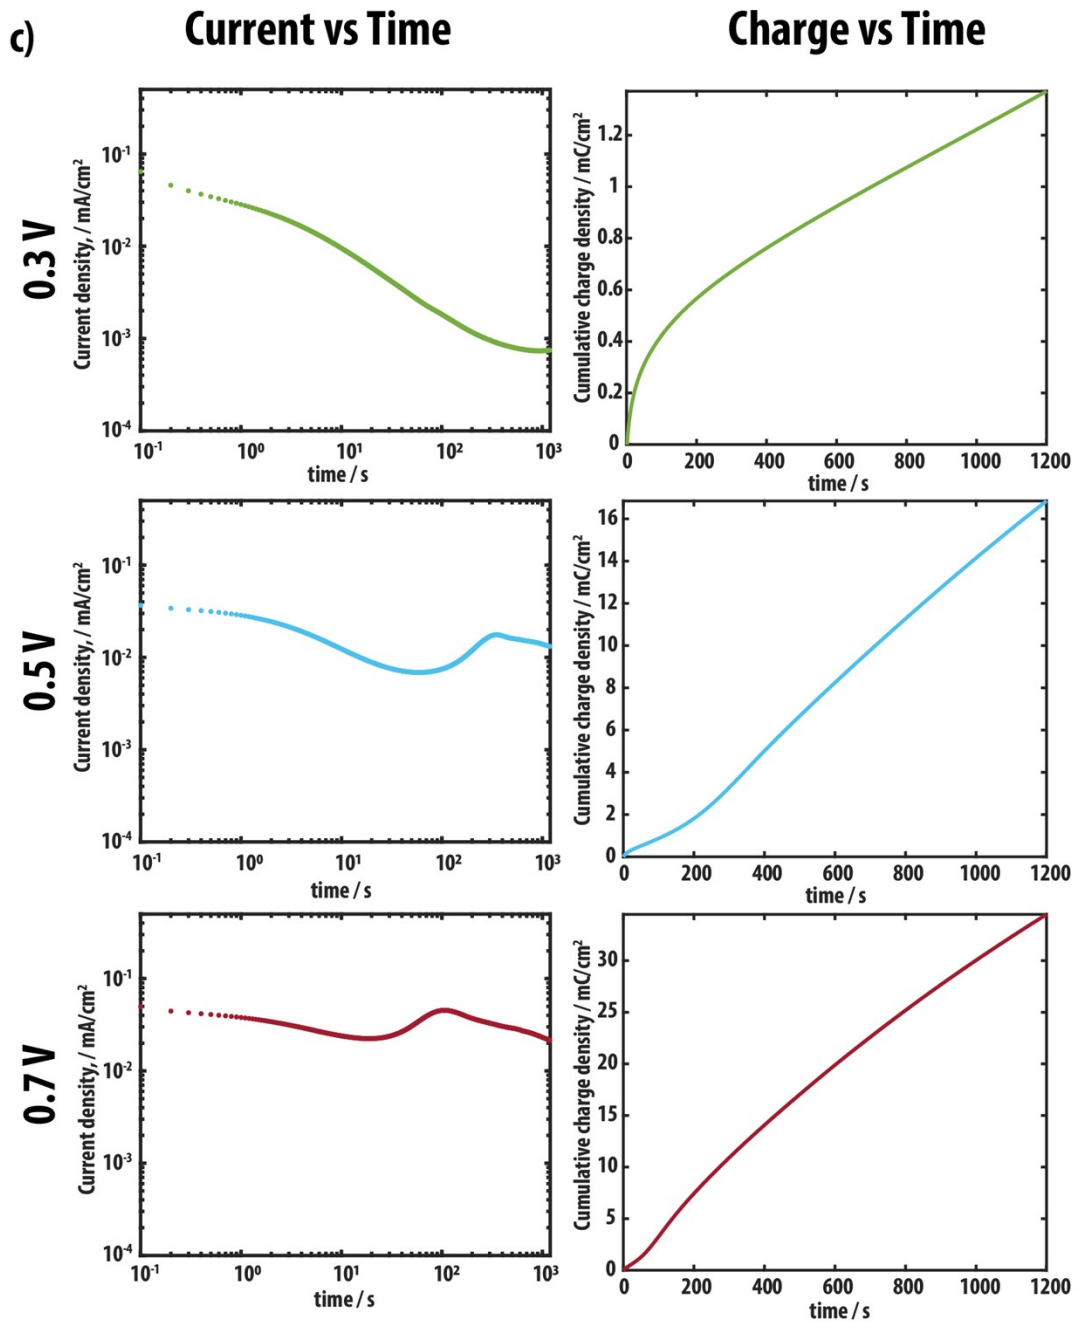

**Figure S4c.** Chronoamperometry and cumulative charge of 10 mM TEG-DP monomer solution electrodeposited at  $E_{\text{dep}} = +0.3$  V, +0.5 V and +0.7 V vs. Ag/Ag<sup>+</sup> which are categorized as regime 3.

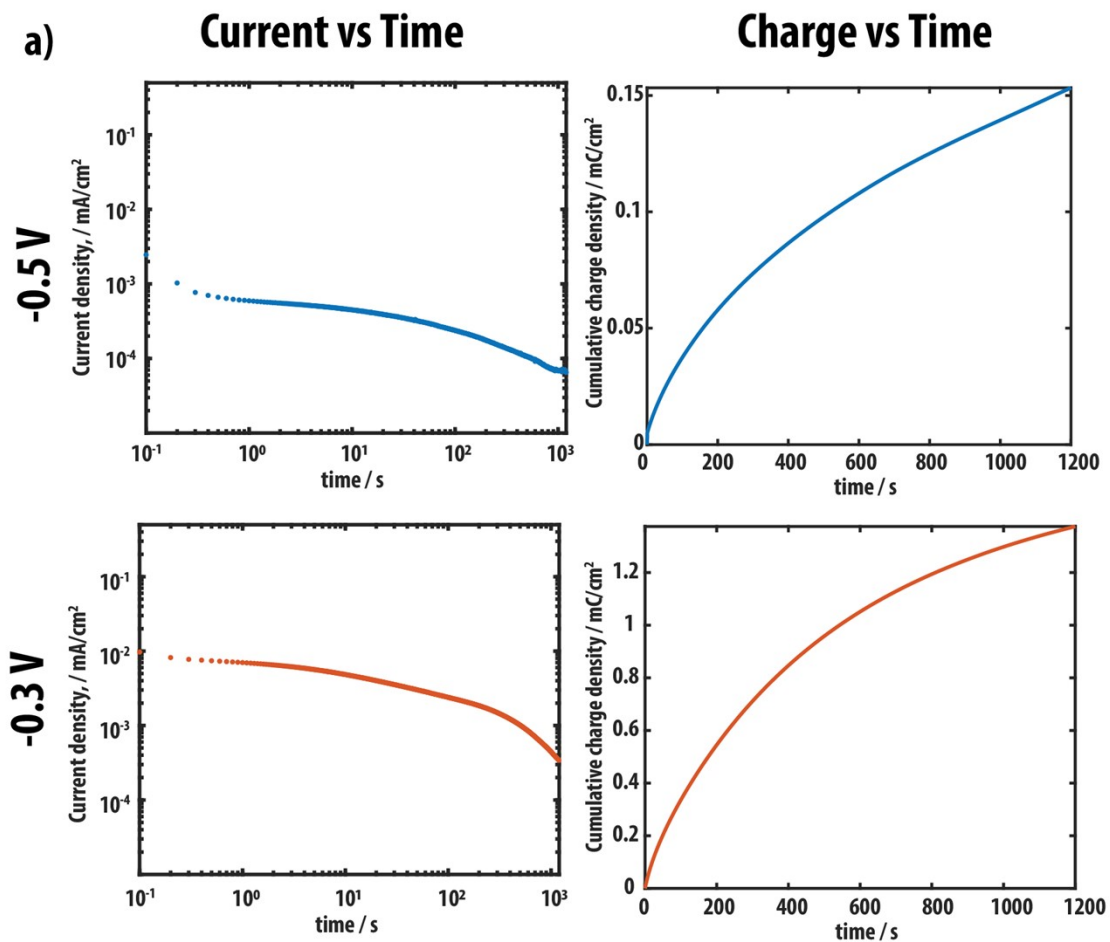

**Figure S5a.** Chronoamperometry and cumulative charge of 1 mM TEG-DP monomer solution electrodeposited at  $E_{\text{dep}} = -0.5$  V and  $-0.3$  V vs.  $\text{Ag}/\text{Ag}^+$  which are categorized as regime 1.

*continued on next page...*

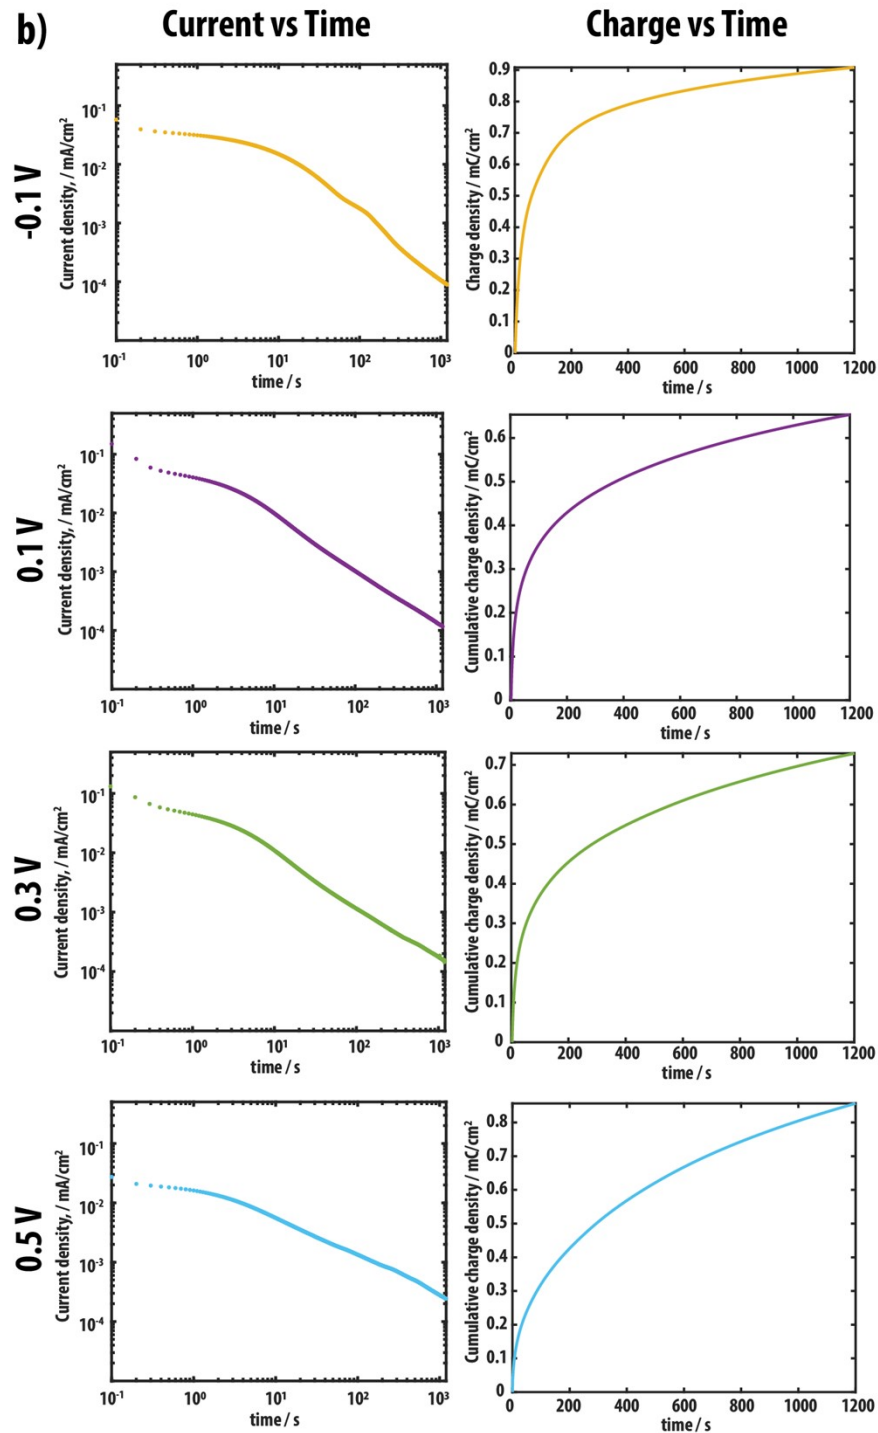

**Figure S5b.** Chronoamperometry and cumulative charge of 1 mM TEG-DP monomer solution electrodeposited at  $E_{\text{dep}} = -0.1 \text{ V}, +0.1 \text{ V}, +0.3 \text{ V}$  and  $+0.5 \text{ V}$  vs.  $\text{Ag}/\text{Ag}^+$  which are categorized as regime 2. *continued on next page...*

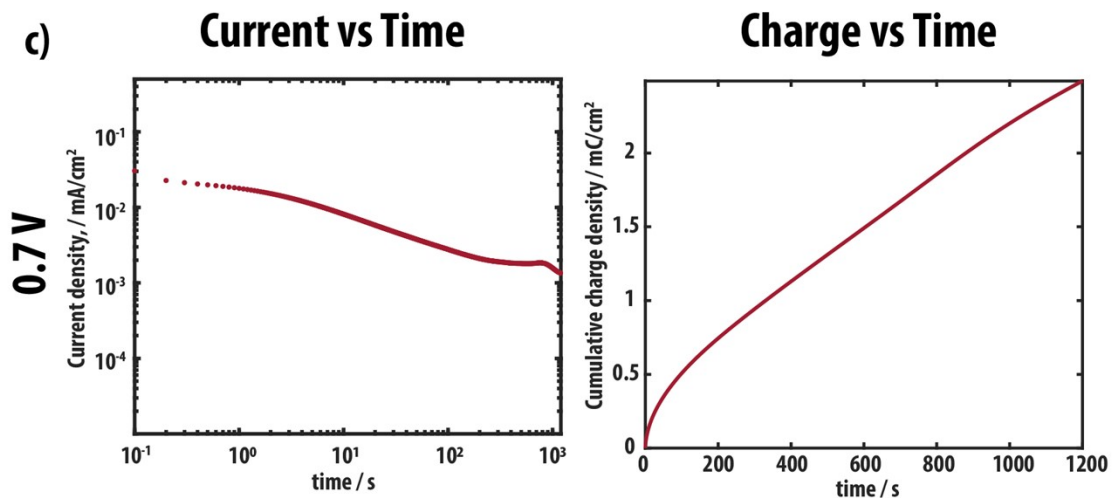

**Figure S5c.** Chronoamperometry and cumulative charge of 1 mM TEG-DP monomer solution electrodeposited at  $E_{\text{dep}} = +0.7$  V vs. Ag/Ag<sup>+</sup> which are categorized as regime 3.



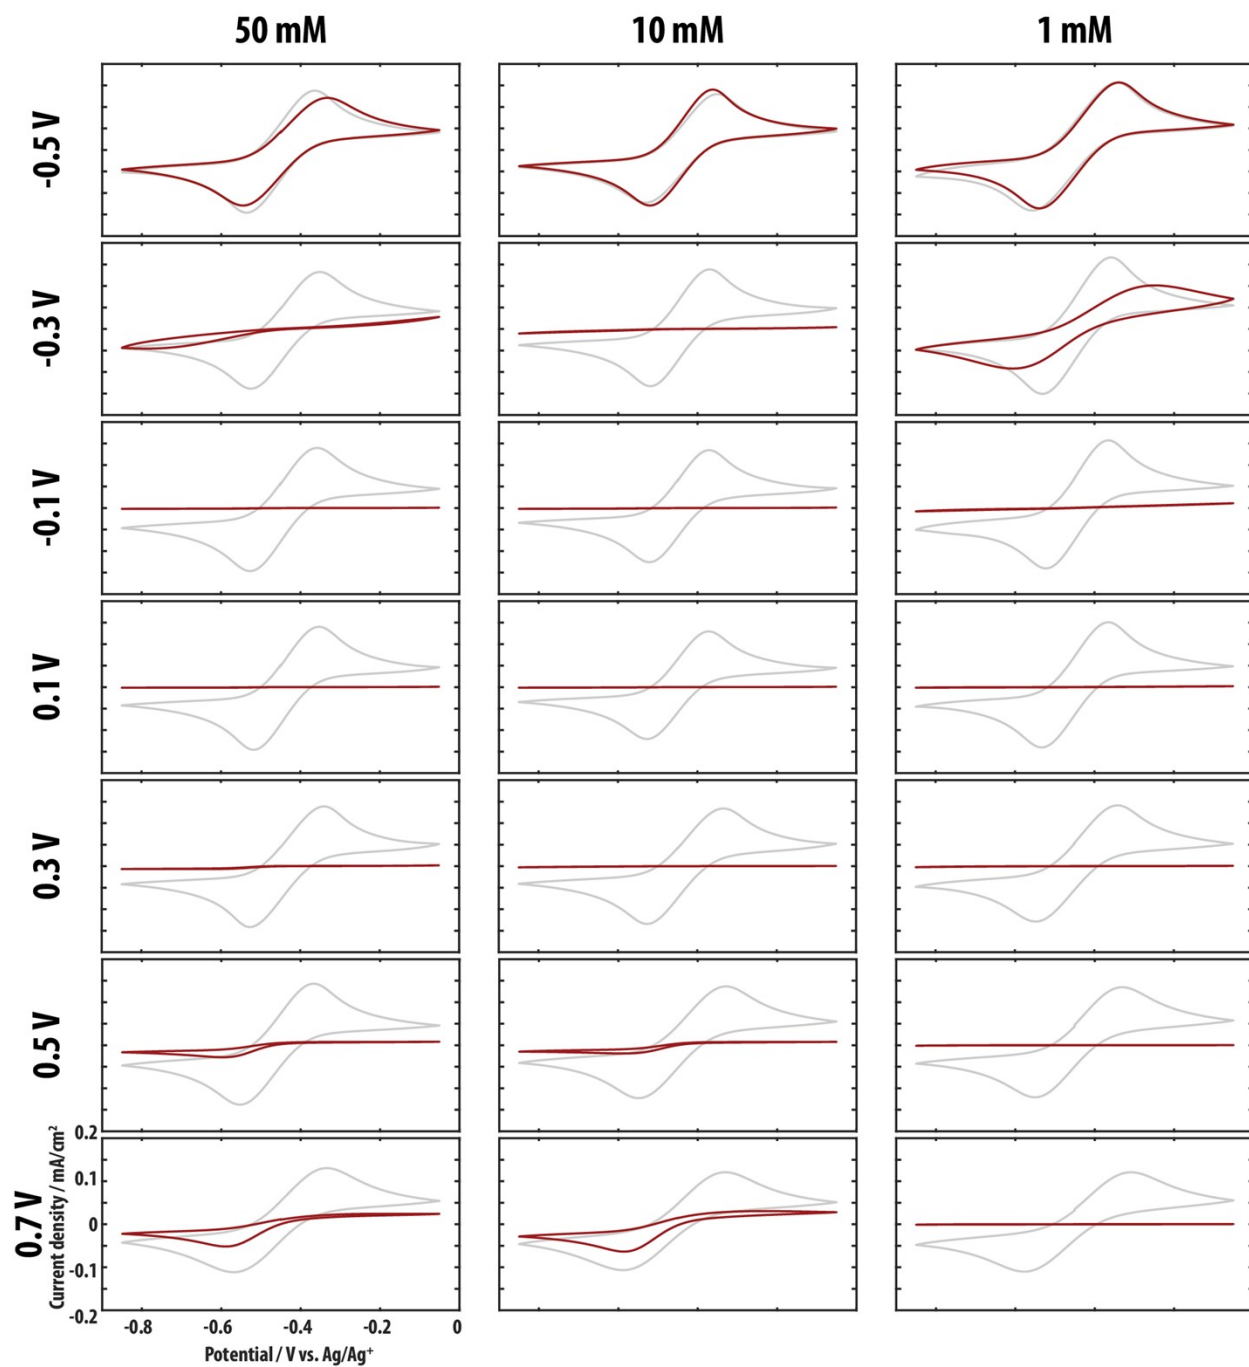

**Figure S6.** Cyclic voltammetry of decamethylferrocene before (light grey) and after (red) pTEG-DP film deposition on ITO-coated planar electrodes at all conditions. Concentrations are labeled at the top of each column, and  $E_{\text{dep}}$  are labeled at the left of each row. Universal scale is labeled at the bottom left plot.

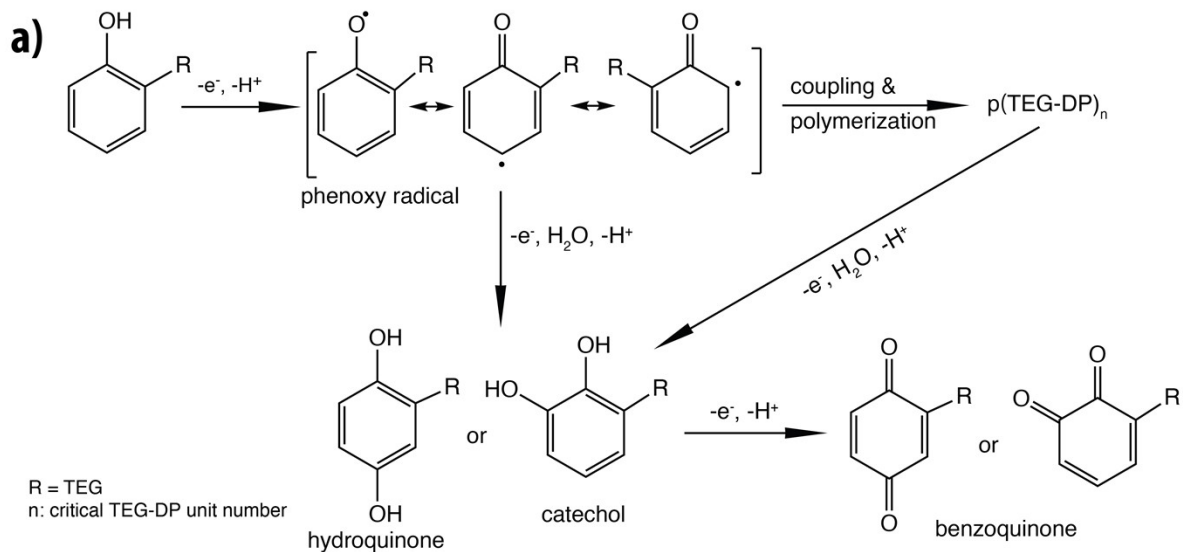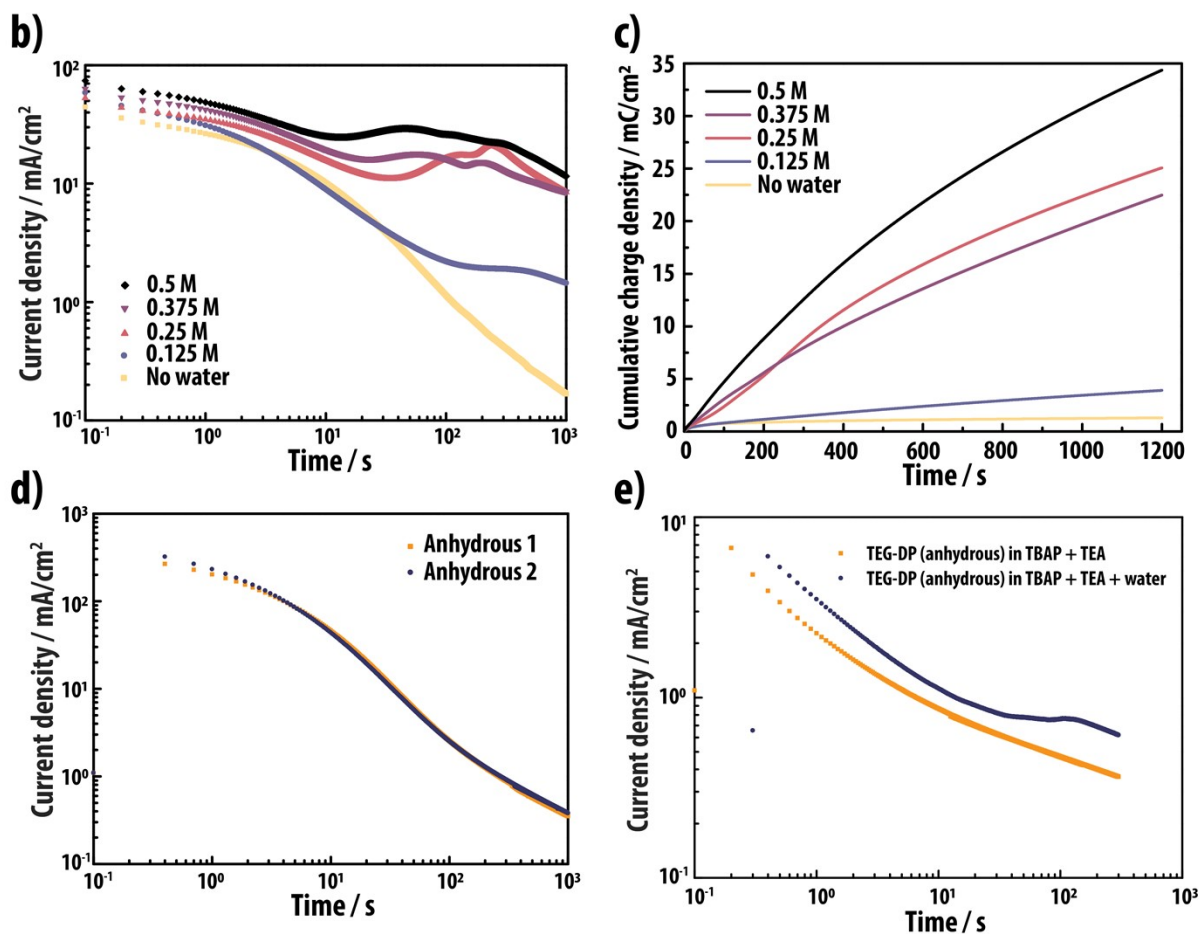

**Figure S7.** (a) Mechanism of phenol group oxidation pathways with water presence (M. Gattrell and D. W. Kirk, *J. Electrochem. Soc.*, **1992**, 139, 2736). (b) Chronoamperometry (CA) of

monomer solution composed of 25 mM TEG-DP, 50 mM TEA (anhydrous), 100 mM TBAP along with varying concentration of DI water ( $E_{\text{dep}} = +0.2 \text{ V vs. Ag/Ag}^+$  for 1200 s). (c) Corresponding cumulative charge passed during electrodeposition. (d) CA of two potentiostatic electrodepositions of TEG-DP in anhydrous monomer solution (25 mM TEG-DP, 50 mM anhydrous TEA, 100 mM TBAP,  $+0.2 \text{ V vs. Ag/Ag}^+$  for 1200 s) that are used for post-deposition oxidation tests in d. (e) CA of the pTEG-DP films deposited under anhydrous conditions in (d) now exposed to monomer-free solutions with and without water, respectively.

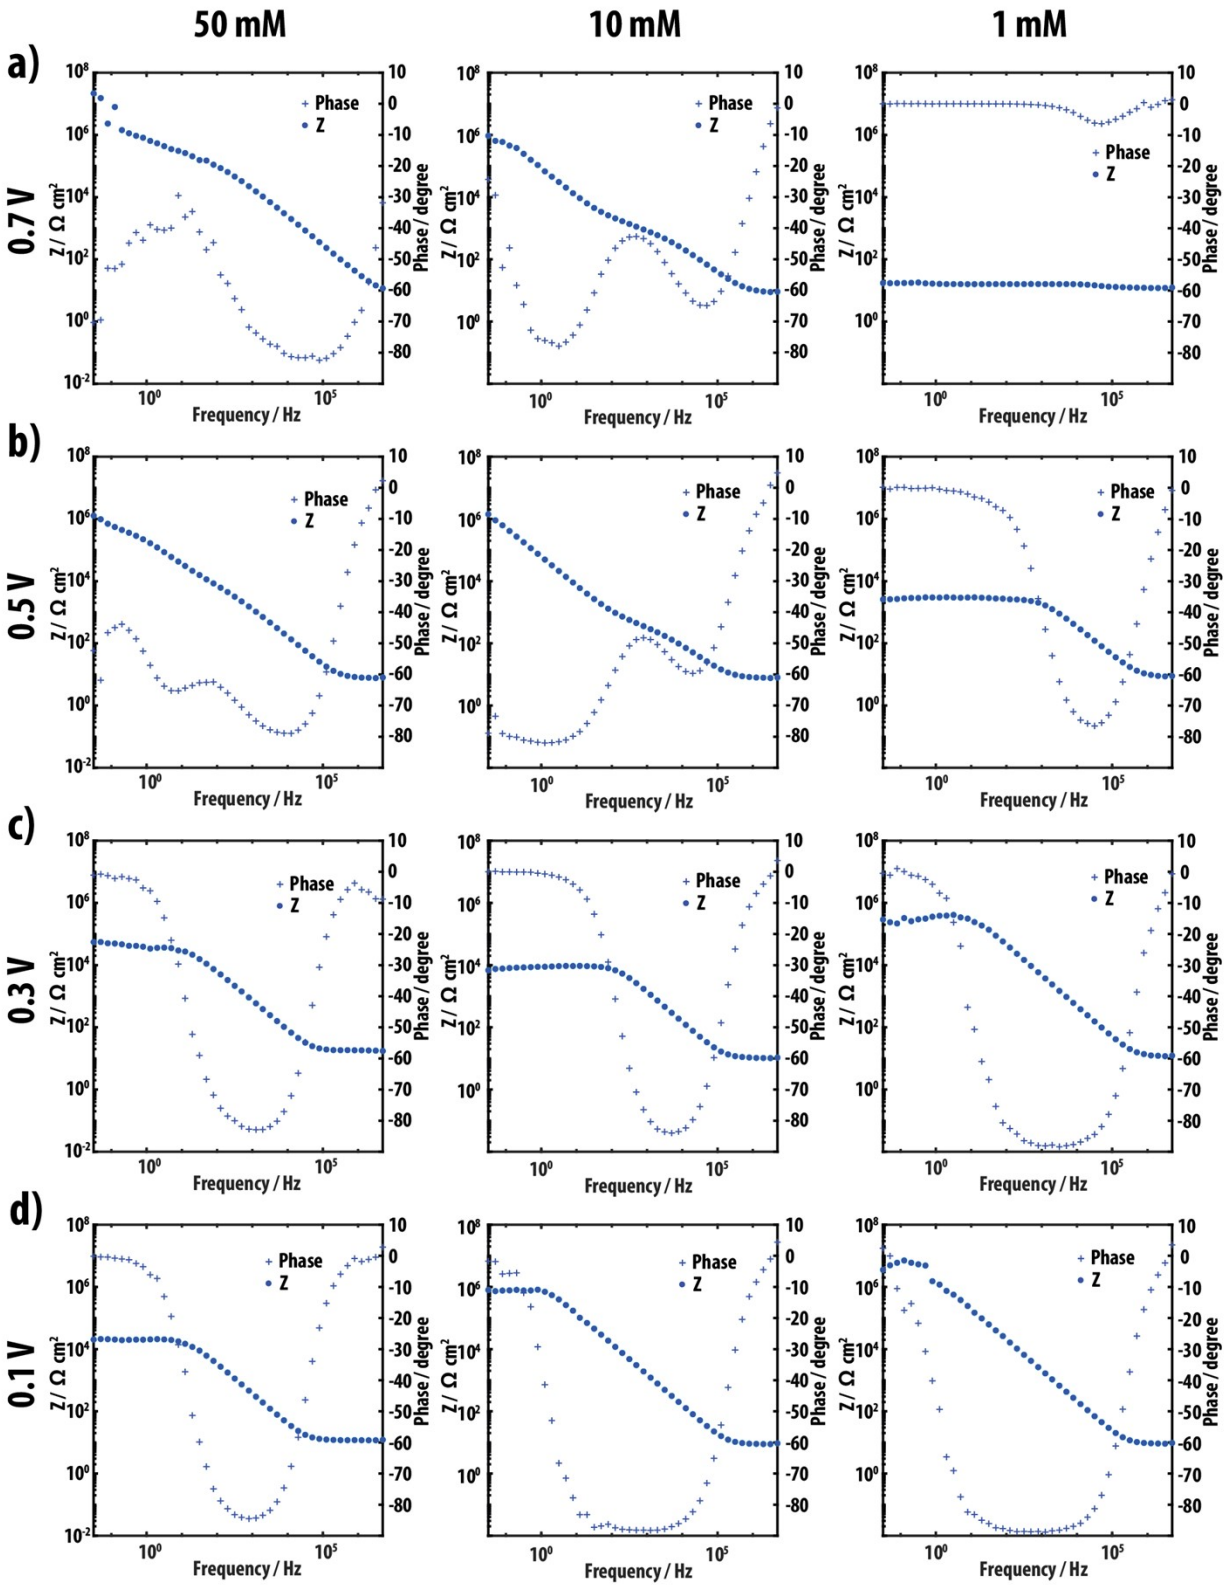

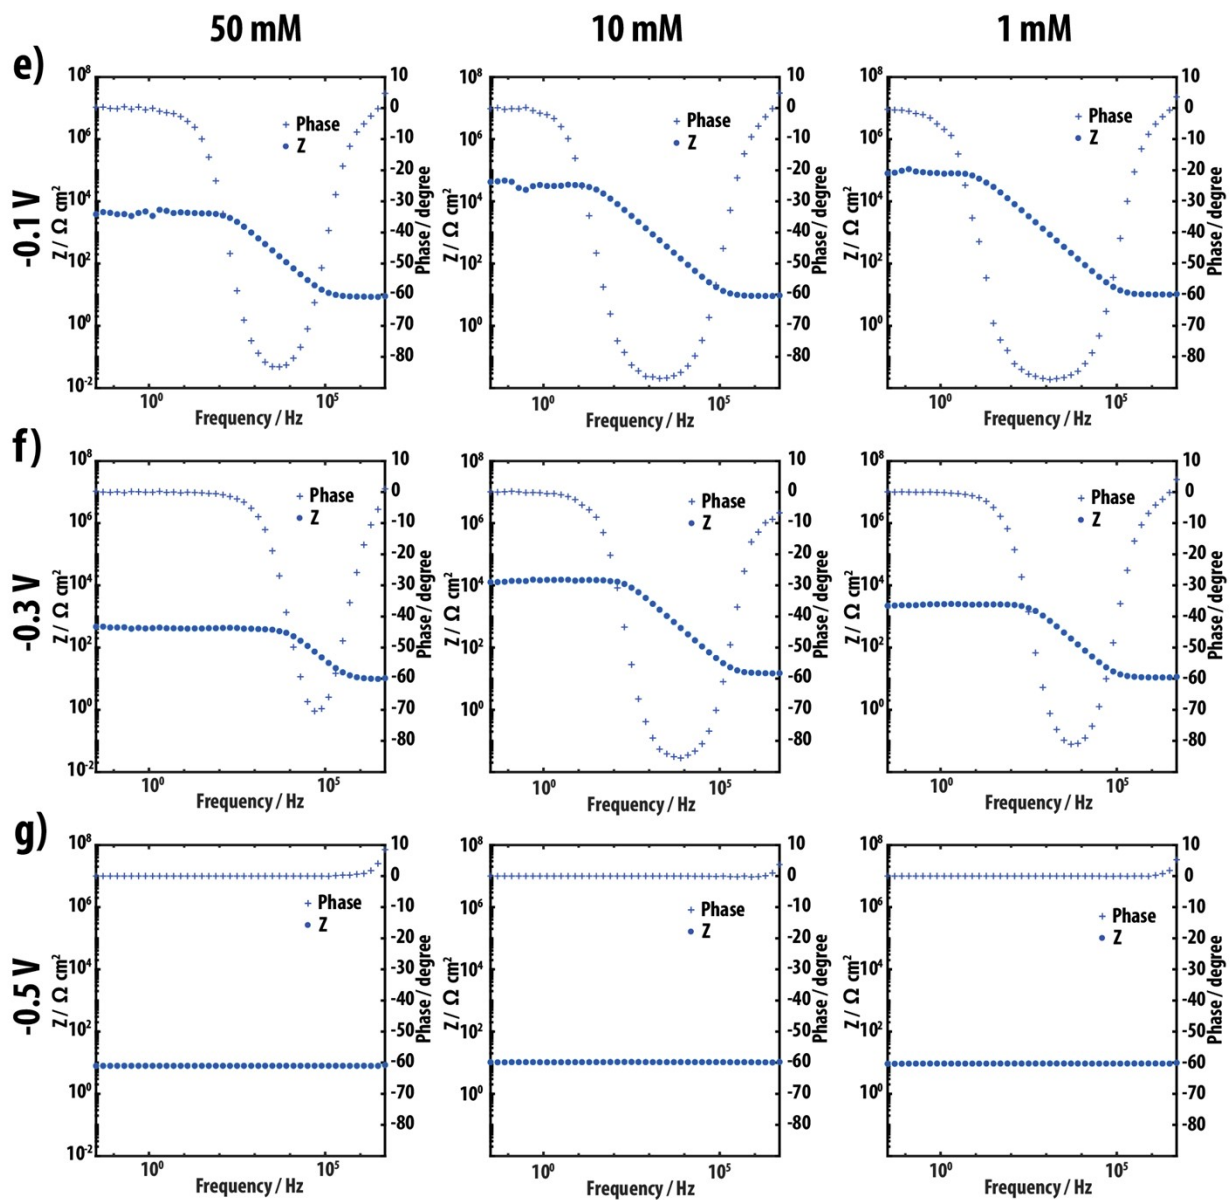

**Figure S8.** (a-g) Bode plot of solid-state EIS measurement of pTEG-DP films deposited at all conditions. TEG-DP concentrations are labeled at the top of each column, and the potentials are labeled at the left of each row.

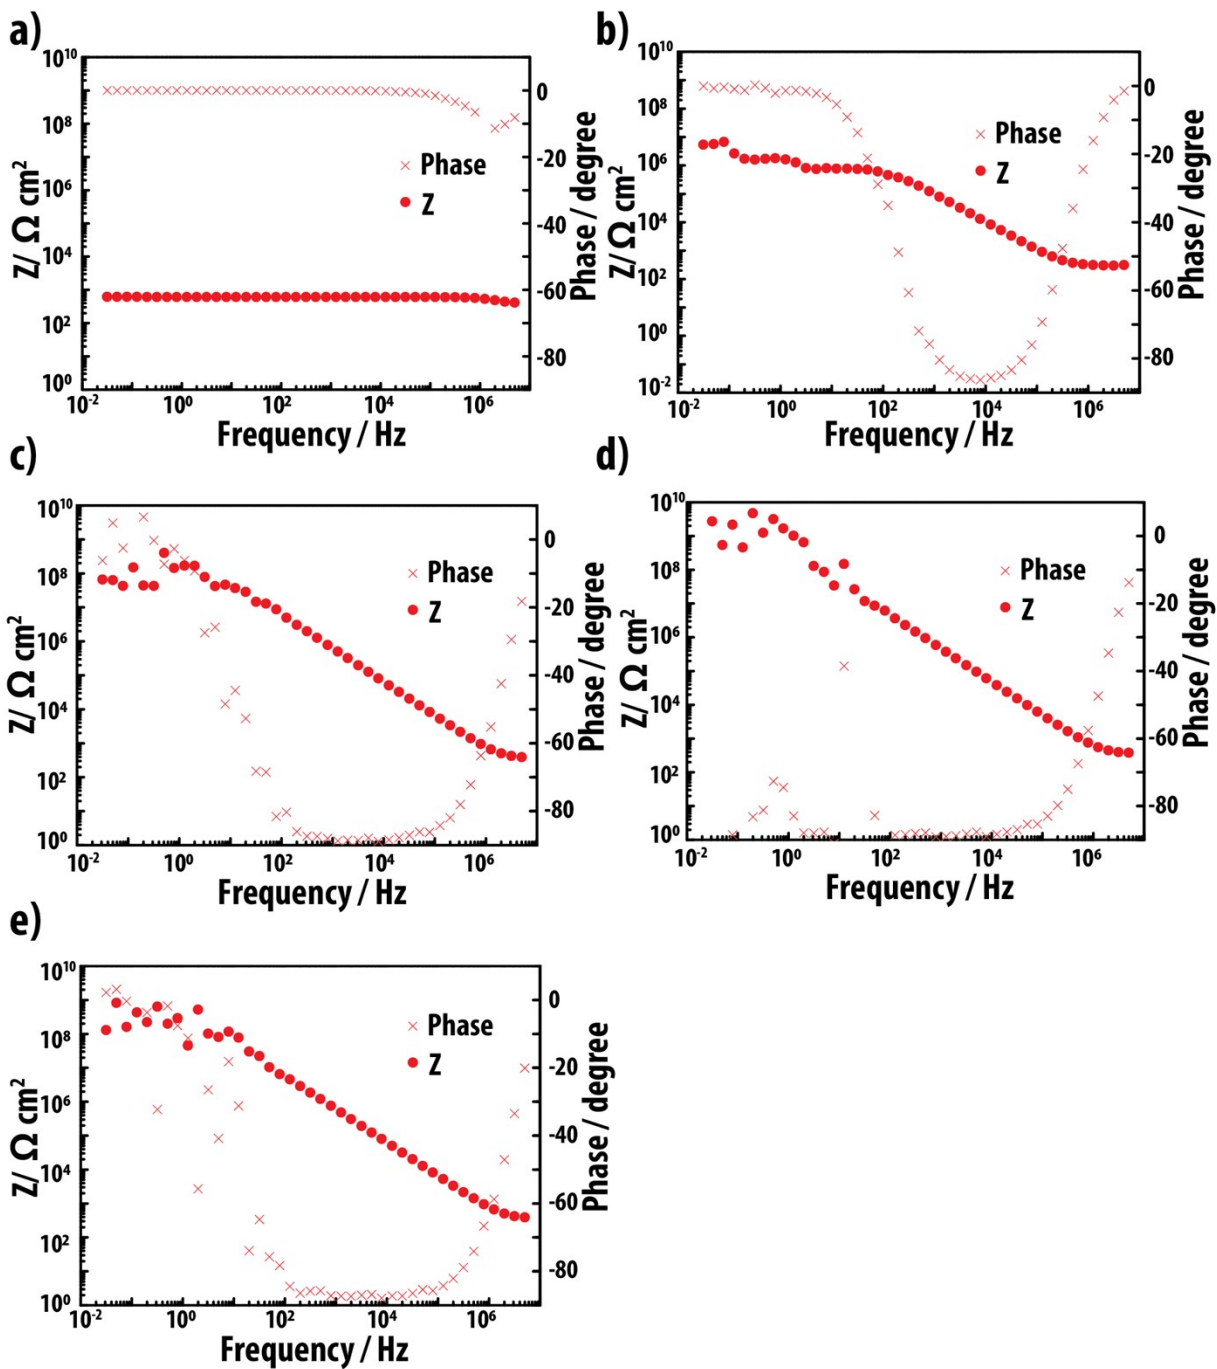

**Figure S9.** Bode plot of solid-state EIS measurement of films obtained from solutions composed of 25 mM TEG-DP 50 mM TEA, 100 mM TBAP with (a) no DI water, (b) 0.125 M DI water, (c) 0.25 M DI water, (d) 0.375 M DI water and (e) 0.5 M DI water.

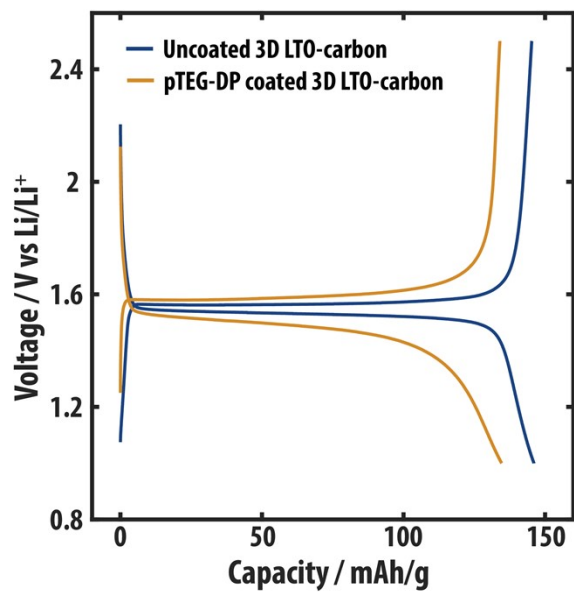

**Figure S10.** Charge and discharge curves (5th cycle) of pTEG-DP coated and uncoated 3D LTO-carbon electrodes (9.1 mA/g, 0.05 C, C-rate is calculated based on the theoretical LTO capacity of 175 mAh/g).

Table S1. Characterization data of all pTEG-DP films.

| <b>Conc. / mM</b> | <b><math>E_{\text{dep}}</math> /V vs. Ag/Ag<sup>+</sup></b> | <b>Thickness / nm</b> | <b>Root-mean-square roughness / nm</b> | <b>Low-frequency Impedance / <math>\Omega \text{ cm}^2</math></b> | <b>Resistivity / <math>\Omega \text{ cm}</math></b> | <b>Relative Permeability to DMFc</b> |
|-------------------|-------------------------------------------------------------|-----------------------|----------------------------------------|-------------------------------------------------------------------|-----------------------------------------------------|--------------------------------------|
| 50                | -0.5                                                        | N/A                   | N/A                                    | ~10                                                               | N/A                                                 | 0.995                                |
| 50                | -0.3                                                        | 15.28                 | 0.72                                   | ~4000                                                             | ~10 <sup>9</sup>                                    | 0.338                                |
| 50                | -0.1                                                        | 15.2                  | 1.34                                   | ~1000                                                             | ~10 <sup>8</sup>                                    | 0.0167                               |
| 50                | 0.1                                                         | 15.1                  | 1.19                                   | ~2000                                                             | ~10 <sup>10</sup>                                   | 0.014                                |
| 50                | 0.3                                                         | 16.76                 | 2.74                                   | ~50000                                                            | ~10 <sup>10</sup>                                   | 0.064                                |
| 50                | 0.5                                                         | 39.6                  | 4.34                                   | >10 <sup>6</sup>                                                  | >10 <sup>11</sup>                                   | 0.218                                |
| 50                | 0.7                                                         | 80.31                 | 3.48                                   | >10 <sup>7</sup>                                                  | >10 <sup>12</sup>                                   | 0.374                                |
| 10                | -0.5                                                        | N/A                   | N/A                                    | ~10                                                               | N/A                                                 | 0.934                                |
| 10                | -0.3                                                        | 10.61                 | 0.76                                   | ~800                                                              | ~10 <sup>8</sup>                                    | 0.060                                |
| 10                | -0.1                                                        | 8.82                  | 1.54                                   | ~40000                                                            | ~10 <sup>10</sup>                                   | 0.015                                |
| 10                | 0.1                                                         | 8.29                  | 0.863                                  | ~20000                                                            | ~10 <sup>10</sup>                                   | 0.011                                |
| 10                | 0.3                                                         | 9.95                  | 0.233                                  | ~50000                                                            | ~10 <sup>10</sup>                                   | 0.016                                |
| 10                | 0.5                                                         | 13.43                 | 3.29                                   | >10 <sup>6</sup>                                                  | >10 <sup>11</sup>                                   | 0.175                                |
| 10                | 0.7                                                         | 12.09                 | 2.39                                   | >10 <sup>6</sup>                                                  | >10 <sup>11</sup>                                   | 0.472                                |
| 1                 | -0.5                                                        | N/A                   | N/A                                    | ~10                                                               | N/A                                                 | 1                                    |
| 1                 | -0.3                                                        | N/A                   | N/A                                    | ~2000                                                             | N/A                                                 | 0.809                                |
| 1                 | -0.1                                                        | N/A                   | N/A                                    | ~100000                                                           | N/A                                                 | 0.045                                |
| 1                 | 0.1                                                         | 7.18                  | 0.88                                   | >10 <sup>6</sup>                                                  | >10 <sup>12</sup>                                   | 0.010                                |
| 1                 | 0.3                                                         | 9.63                  | 1.52                                   | ~300000                                                           | ~10 <sup>11</sup>                                   | 0.012                                |
| 1                 | 0.5                                                         | 8.96                  | 0.75                                   | ~2000                                                             | ~10 <sup>9</sup>                                    | 0.007                                |
| 1                 | 0.7                                                         | 9.53                  | 1.31                                   | ~400                                                              | ~10 <sup>8</sup>                                    | 0.008                                |
